# Supplementary material for: Facile synthesis of in situ carbon-coated CoS2 micro/nano-spheres as high-performance anode materials for sodium-ion batteries
Source: Royal Society of Chemistry journal article supplement (doi:10.1039/d4nr03503h), 2024-11-22
Supplement: d4nr03503h1.pdf [file d4nr03503h1.pdf]

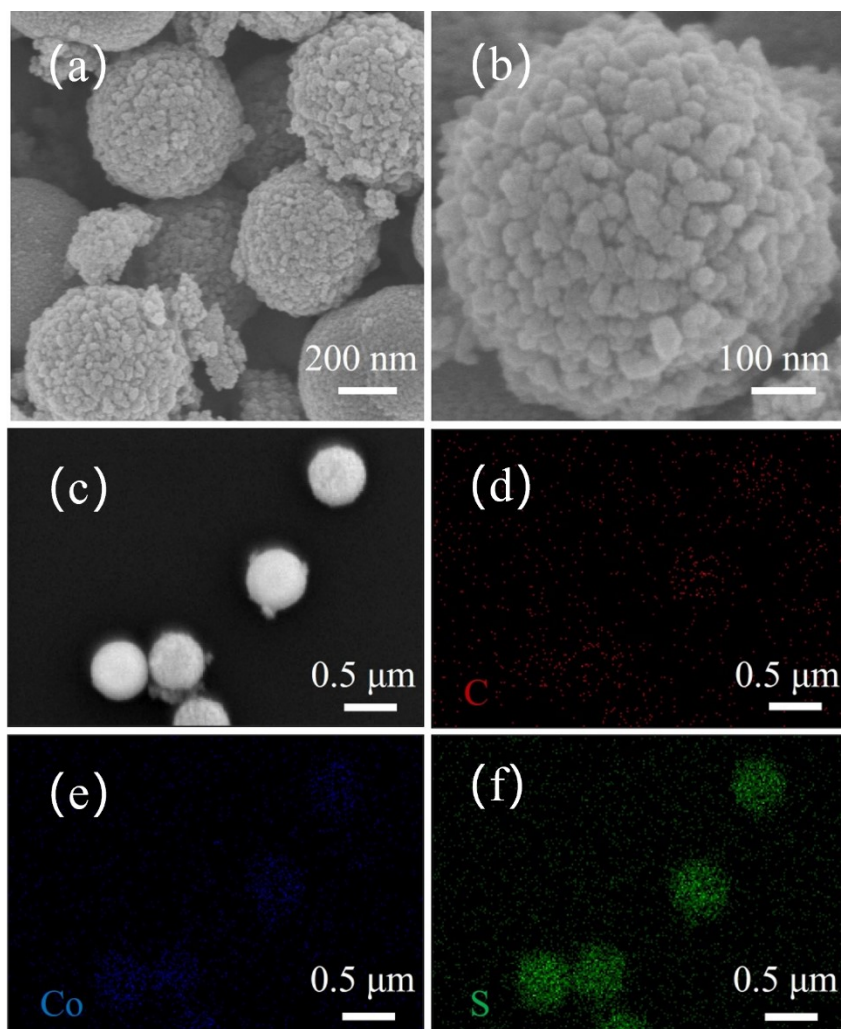

Fig S1. SEM of CoS<sub>2</sub>@C at 450 °C (a, b) and corresponding elemental mapping images of S, C, Co (c, d, e, f)

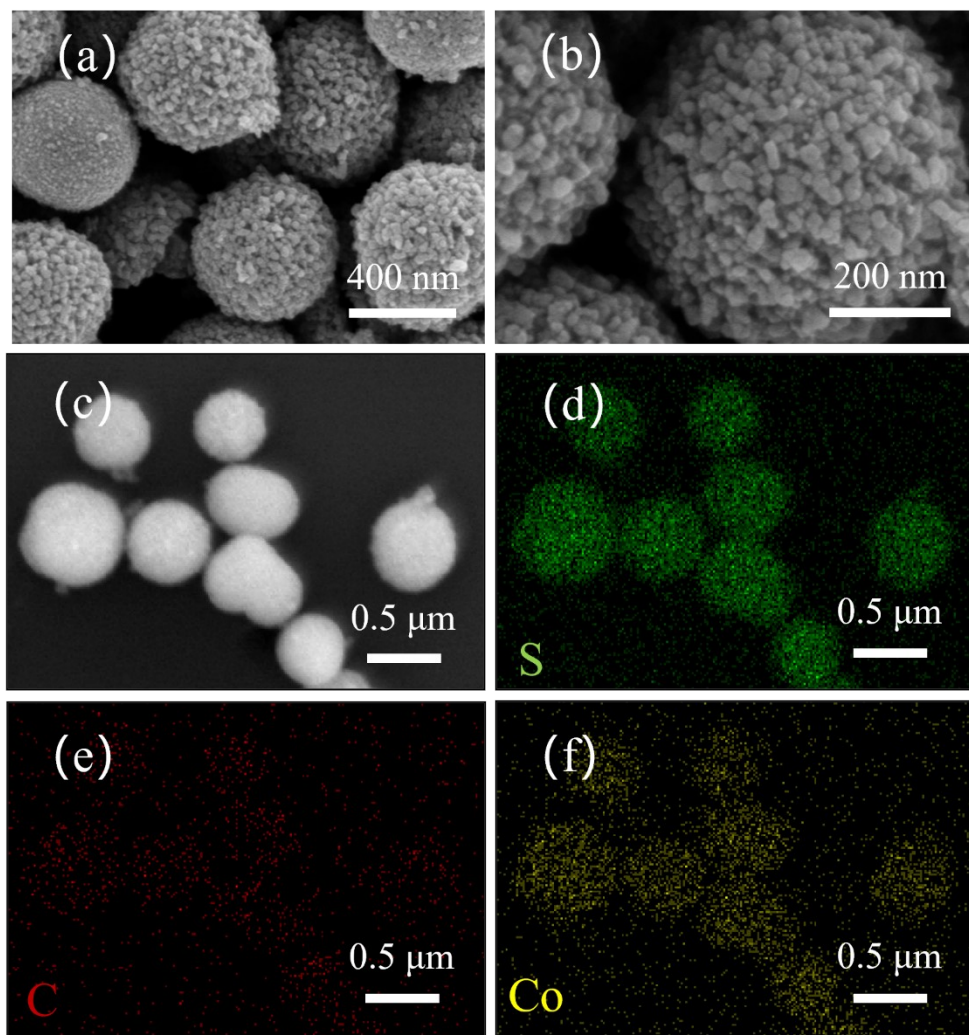

Fig S2. SEM of CoS<sub>2</sub>@C at 550 °C (a, b) and corresponding elemental mapping images of S, C, Co (c, d, e, f)

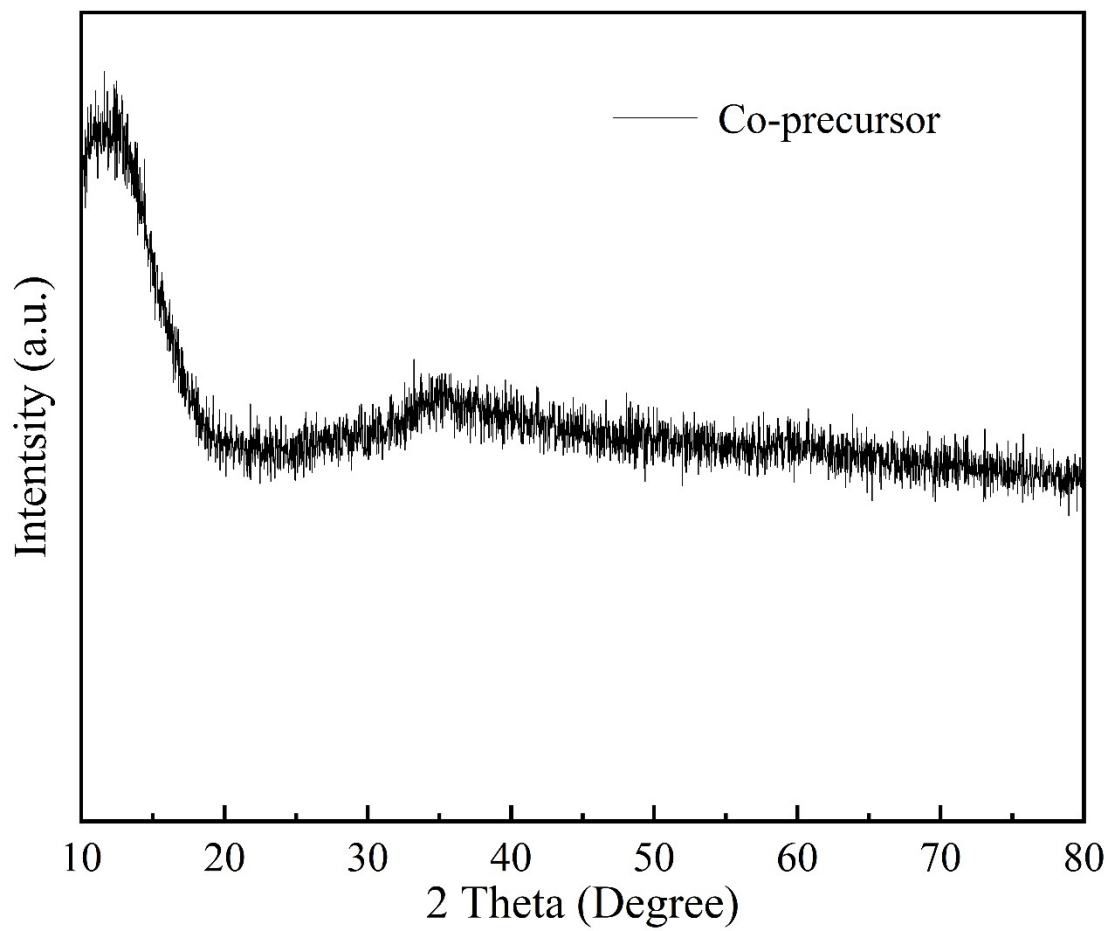

Fig S3. XRD patten of the cobalt-precursor

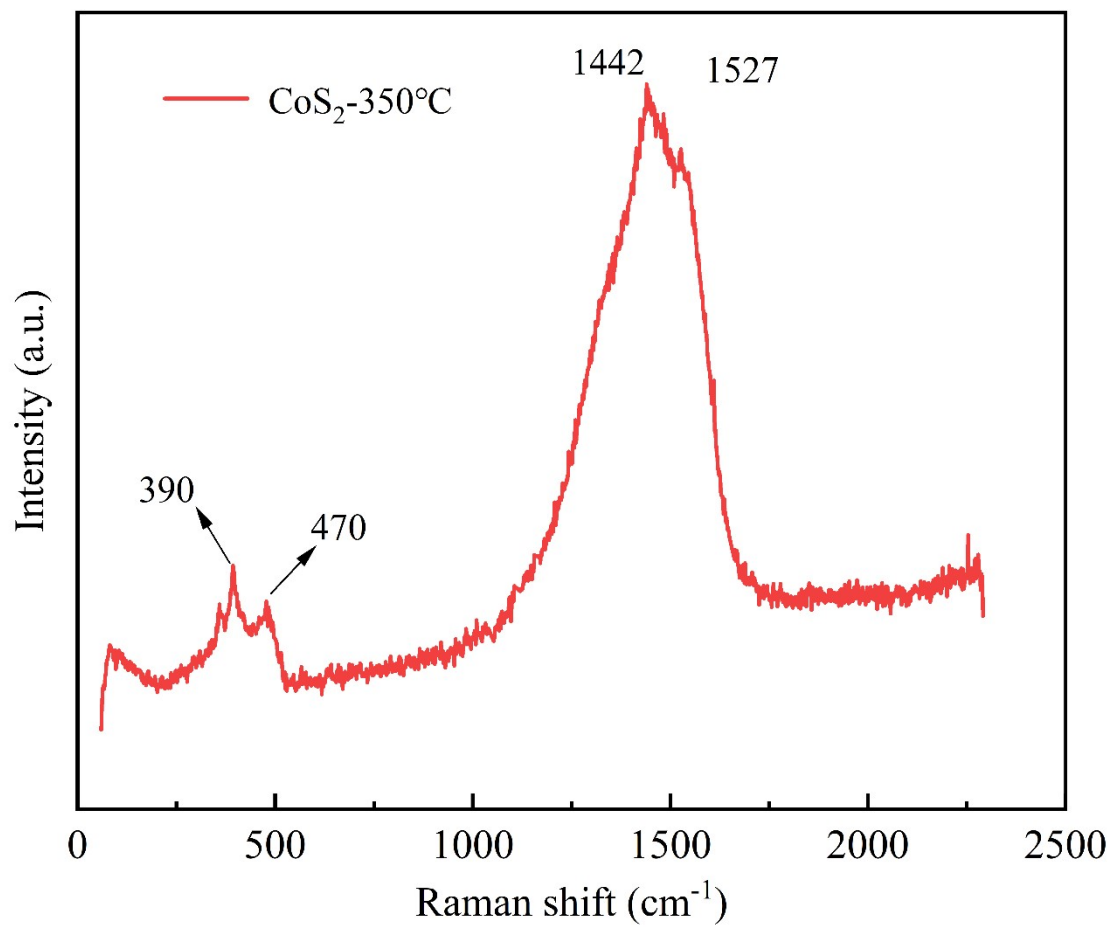

Fig S4. Raman image of CoS<sub>2</sub>@C at 350 °C

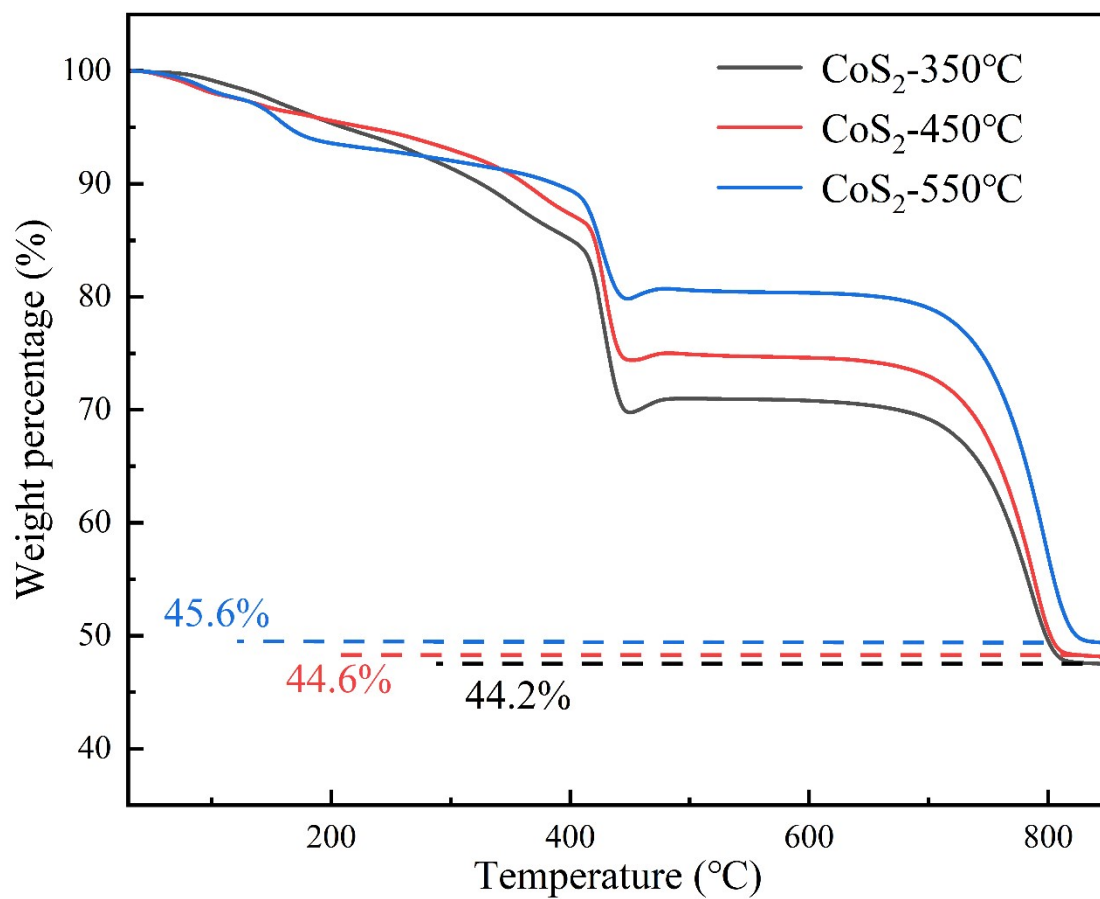

Fig.S5. TG curves of CoS<sub>2</sub>@C at 350°C, 450°C and 550°C at a heating rate of 10 °C min<sup>-1</sup> in air.

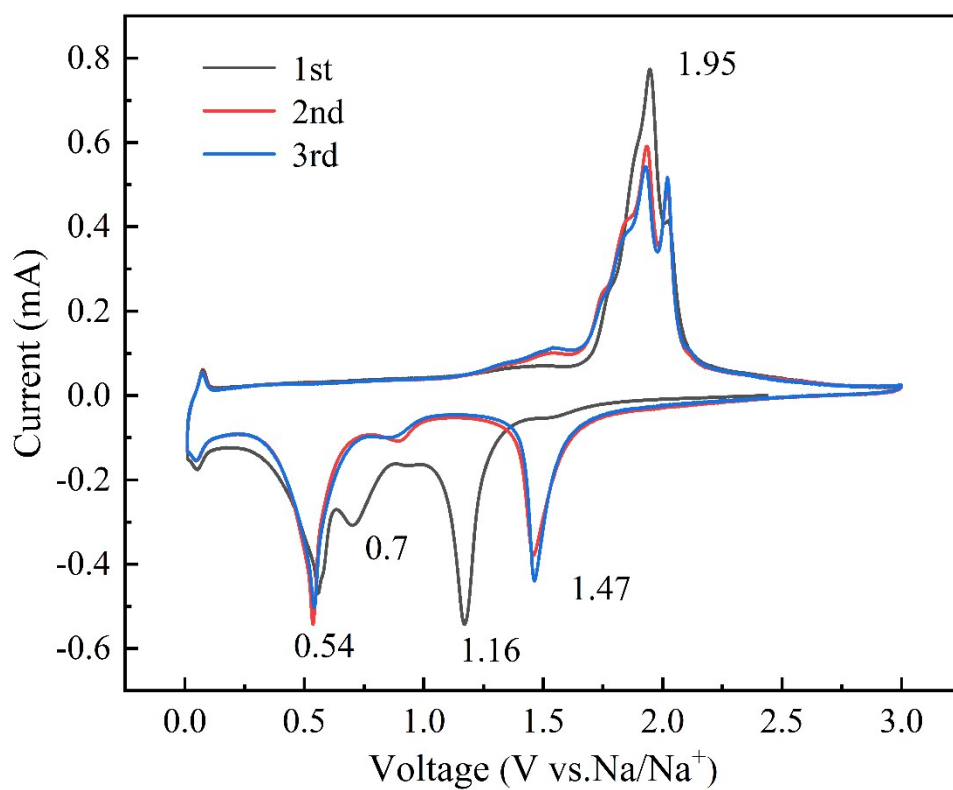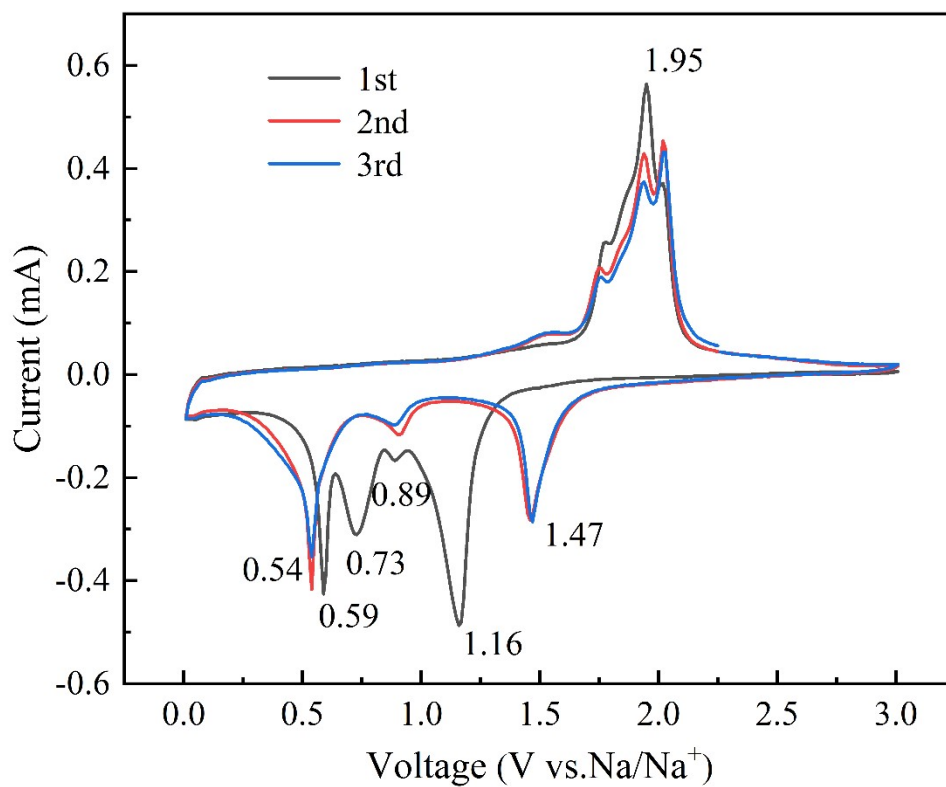

Fig S6. CV curves of CoS<sub>2</sub>@C at 450 °C and CoS<sub>2</sub>@C at 550 °C at a scan rate of 0.1 mV s<sup>-1</sup>

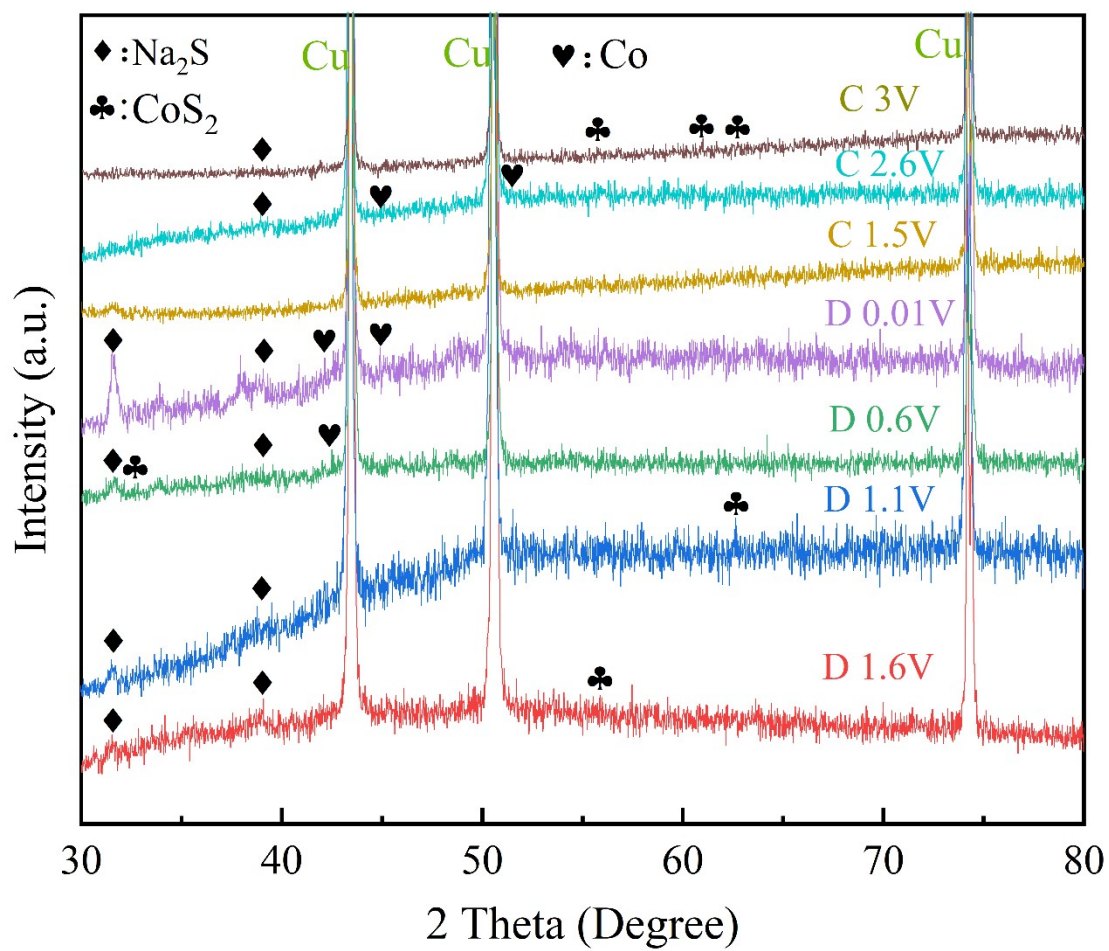

Fig S7. Ex-situ XRD patterns at different voltage states of CoS<sub>2</sub>@C at 350 °C



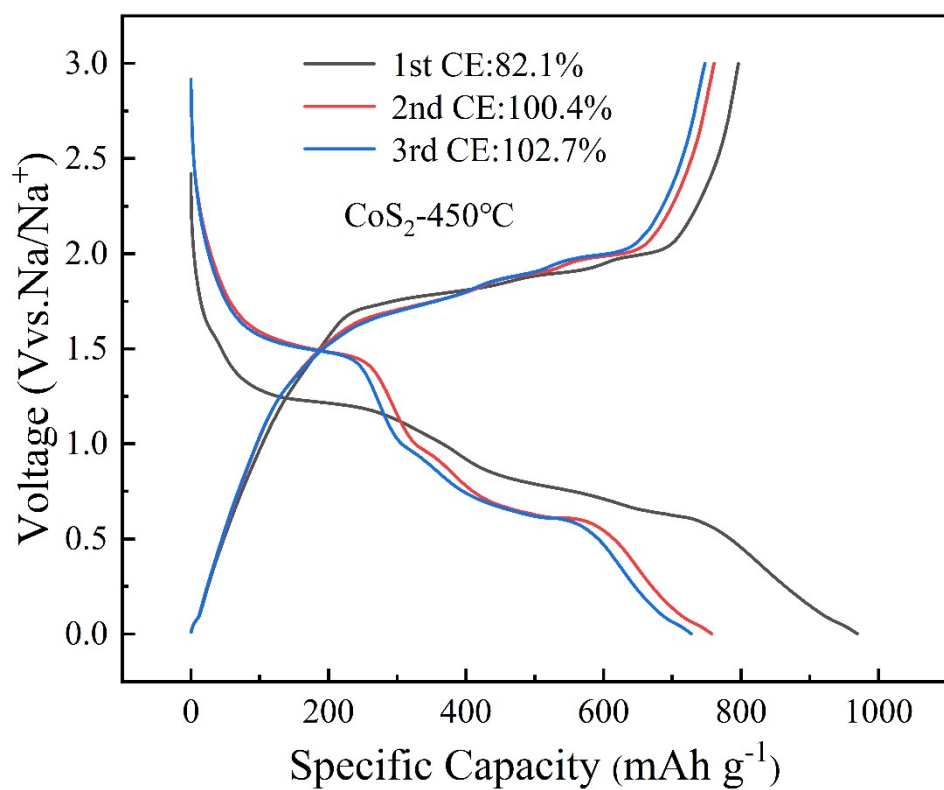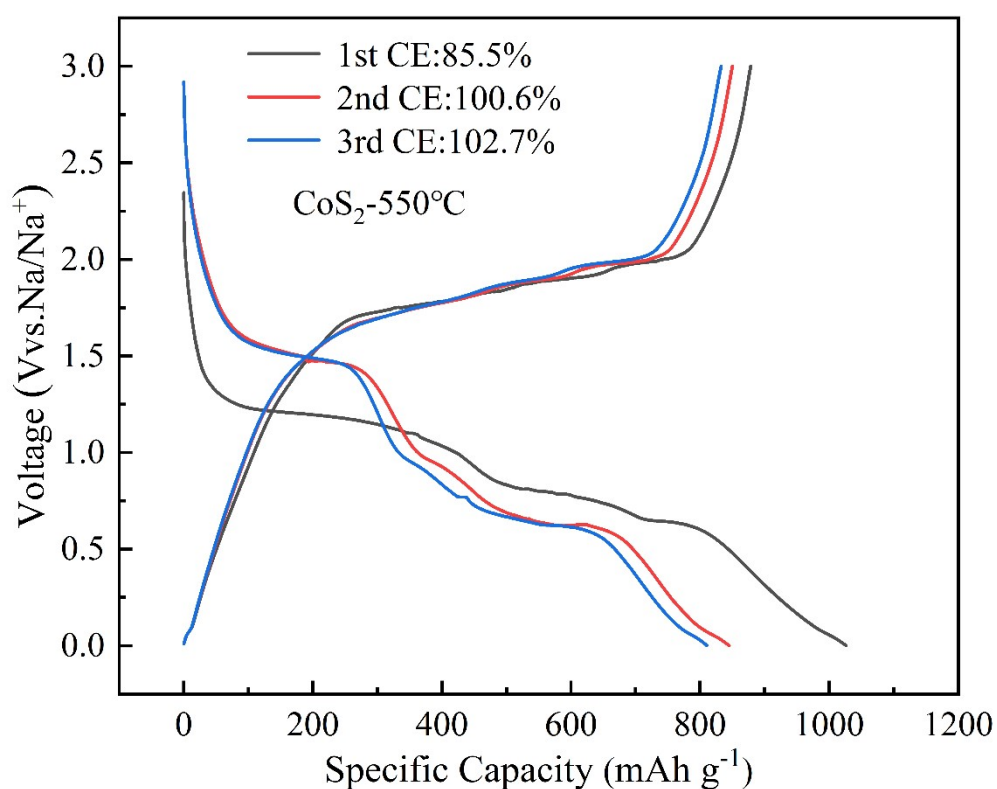

Fig S8. Discharge-charge curves of CoS<sub>2</sub>@C at 450 °C, CoS<sub>2</sub>@C at 550 °C for the first three cycles at 50 mA g<sup>-1</sup> current density



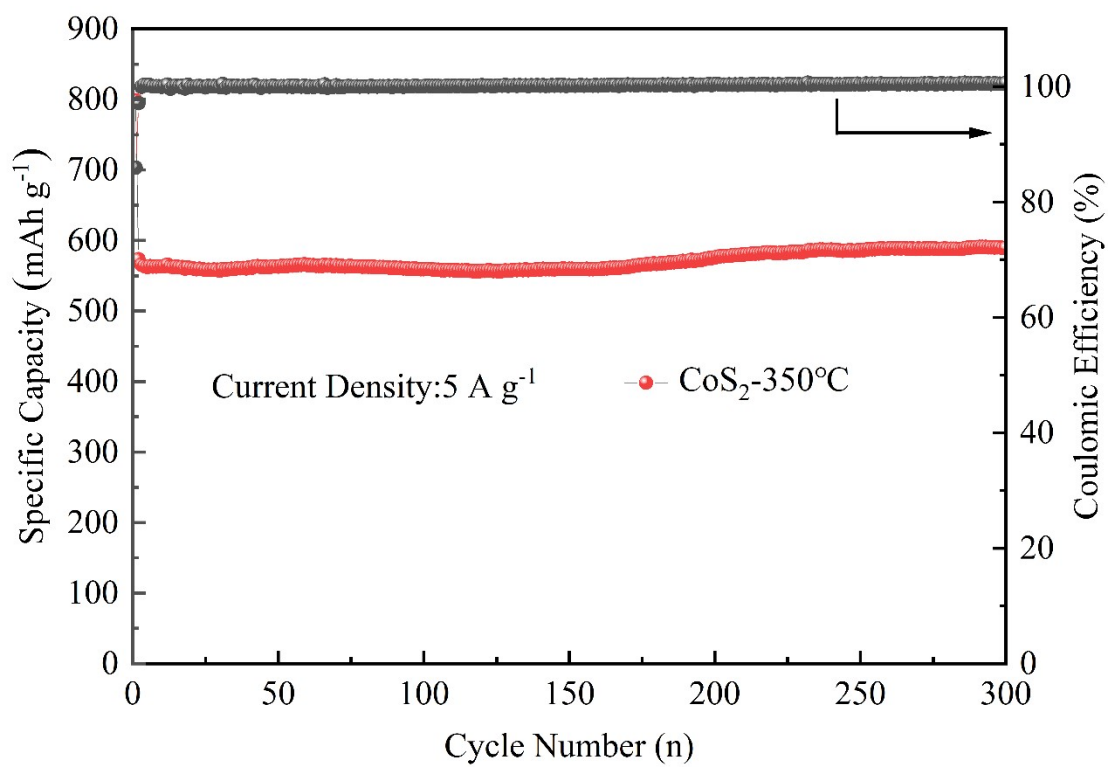

Fig.S9. Long-term cycling performance of CoS<sub>2</sub>@C at 350°C at 5 A g<sup>-1</sup>

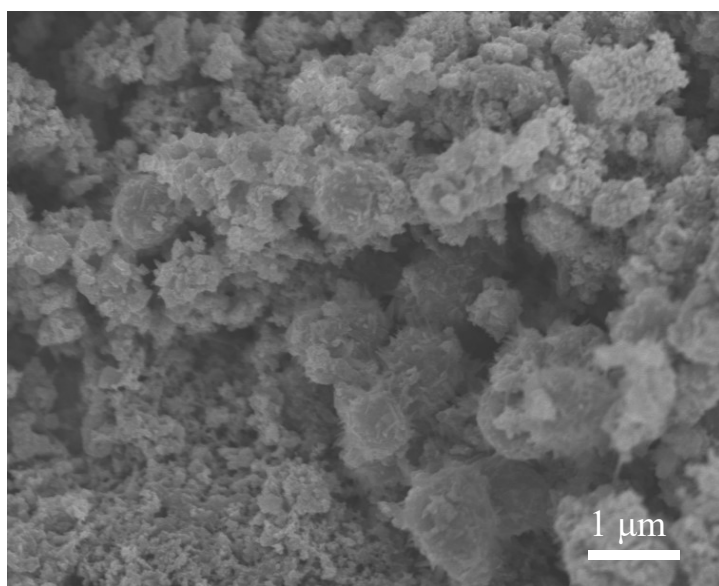

Fig S10. SEM image of CoS<sub>2</sub>@C at 350 °C after cycles at current density of 2 A g<sup>-1</sup>

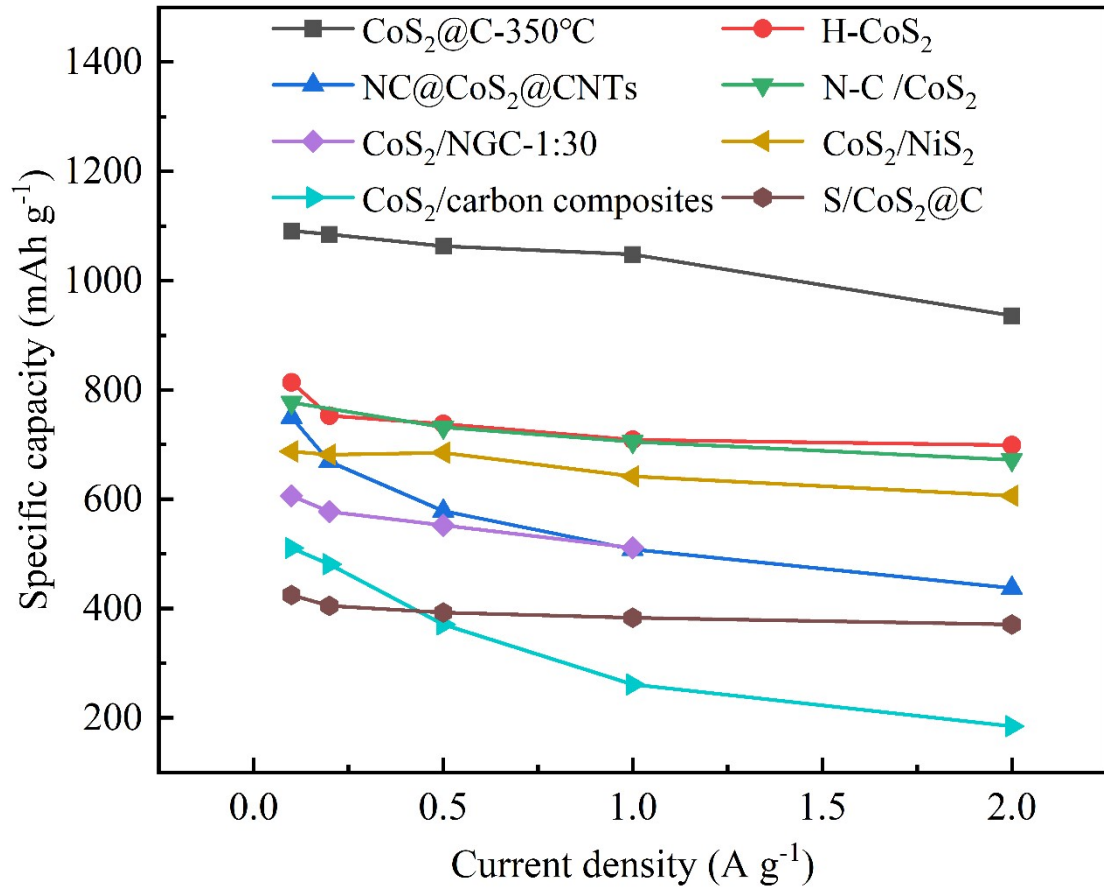

Fig S11. Comparison of the rate performance of the CoS<sub>2</sub>@C at 350°C electrode in our work and reported CoS<sub>2</sub>-based composites

Table S1. Elemental analysis results for CoS<sub>2</sub>@C -350 °C, CoS<sub>2</sub>@C -450 °C and CoS<sub>2</sub>@C -550 °C

|                         | C (%) | S (%) | Co (%) |
|-------------------------|-------|-------|--------|
| CoS <sub>2</sub> -350°C | 7.69  | 53.07 | 24.93  |
| CoS <sub>2</sub> -450°C | 5.61  | 57.17 | 26.14  |
| CoS <sub>2</sub> -550°C | 3.71  | 58.92 | 29.46  |
